# Supplementary material
Source: publisher figshare collection journal article supplement (https://acs.figshare.com/ndownloader/files/3737845)
Supplement: Supplementary file 1 [file 3737845]

*Supporting information*

**Solvent Mediated Structural Transition of  $\text{KI}_4\text{K}$  Self-Assemblies: from  
Nanotubes to Nanofibrils**

Yurong Zhao,<sup>†</sup> Li Deng,<sup>†</sup> Jiqian Wang,<sup>†</sup> Hai Xu,<sup>\*,†</sup> and Jian R. Lu<sup>\*,‡</sup>

<sup>†</sup>Centre for Bioengineering and Biotechnology, China University of Petroleum (East China), 66 Changjiang  
West Road, Qingdao 266580, China.

<sup>‡</sup>Biological Physics Group, School of Physics and Astronomy, The University of Manchester, Manchester M13  
9PL, United Kingdom.

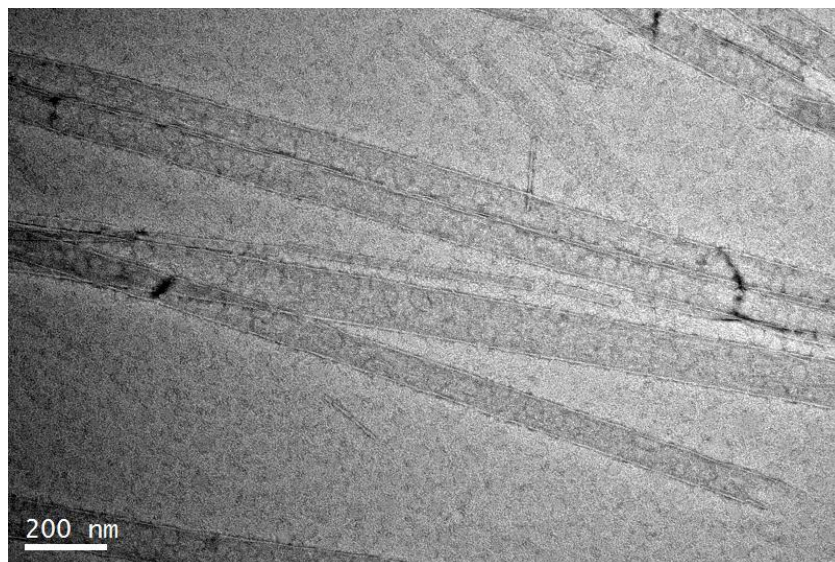

**Figure S1.** Negative-staining TEM image of the KI<sub>4</sub>K self-assemblies in the mixture of water and acetonitrile (10% (vol/vol) acetonitrile).

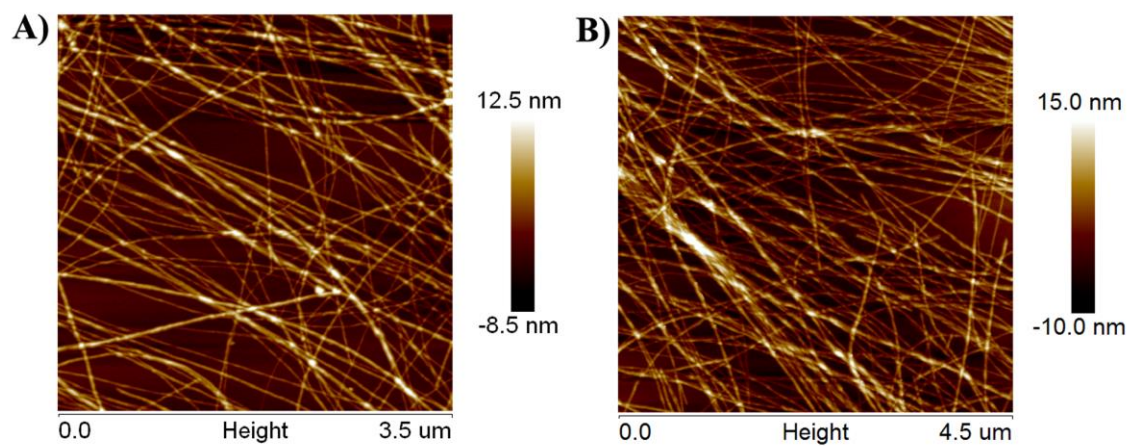

**Figure S2.** AFM images of the KI<sub>4</sub>K assemblies in (A) 80% (vol/vol) methanol and (B) methanol. Note that the peptide concentration was fixed at 16mM and the peptide solution was incubated for 7 days before further characterization.

**Table S1.** The best fitted parameters for the SANS curves shown in Figure 4.

| Model and Parameter     | Solvent | Water                                 | 20% (vol/vol)<br>Acetonitrile | 80% (vol/vol)<br>Acetonitrile |
|-------------------------|---------|---------------------------------------|-------------------------------|-------------------------------|
|                         |         | LamellarModel+<br>HollowCylinderModel | LamellarModel                 | HollowCylinderModel           |
| Fitting Model           |         |                                       |                               |                               |
| p1_background           |         | 0.02                                  | ---                           | 0.019                         |
| p1_radius <sup>a)</sup> |         | 450 Å                                 | ---                           | 42 Å                          |
| p1_core_radius          |         | 431 Å                                 | ---                           | 20 Å                          |
| p1_length               |         | >1000 Å                               | ---                           | >1000 Å                       |
| p1_axis_ratio           |         | ---                                   | ---                           | ---                           |
| p1_scale                |         | 0.00015                               | ---                           | 0.027                         |
| p1_sldCyl               |         | 3.8e-06                               | ---                           | 4e-06                         |
| p1_sldSlov              |         | 6.35e-06                              | ---                           | 5.206e-06                     |
| p2_background           |         | 0.02                                  | 0.02                          | ---                           |
| p2_bi_thick             |         | 19 Å                                  | 20 Å                          | ---                           |
| p2_scale                |         | 0.033                                 | 0.018                         | ---                           |
| p2_sld_bi               |         | 3.8e-06                               | 4e-06                         | ---                           |
| p2_sld_sol              |         | 6.35e-06                              | 6.064e-06                     | ---                           |

Note: a) the diameter was fixed as 90 nm during the fitting.
